# Supplementary material for: Single-crystalline-like indium tin oxide thin films prepared by plasma enhanced atomic layer deposition
Source: Royal Society of Chemistry journal article supplement (doi:10.1039/d2tc01834a), 2022-01-01
Supplement: d2tc01834a1.pdf [file d2tc01834a1.pdf]

Table S1. Relative atomic ratios of In, O, and Sn for the ITO films with different SnO<sub>2</sub> cycle ratios.

| SnO <sub>2</sub> cycle ratio (%) | Relative atomic ratio (%) |     |      |
|----------------------------------|---------------------------|-----|------|
|                                  | In                        | Sn  | O    |
| 2.5                              | 39.9                      | 1.0 | 59.1 |
| 5.0                              | 38.9                      | 1.6 | 59.5 |
| 7.5                              | 38.3                      | 2.3 | 59.3 |
| 10.0                             | 37.3                      | 3.3 | 59.4 |
| 15.0                             | 36.5                      | 4.2 | 59.3 |
| 20.0                             | 35.4                      | 5.8 | 58.9 |

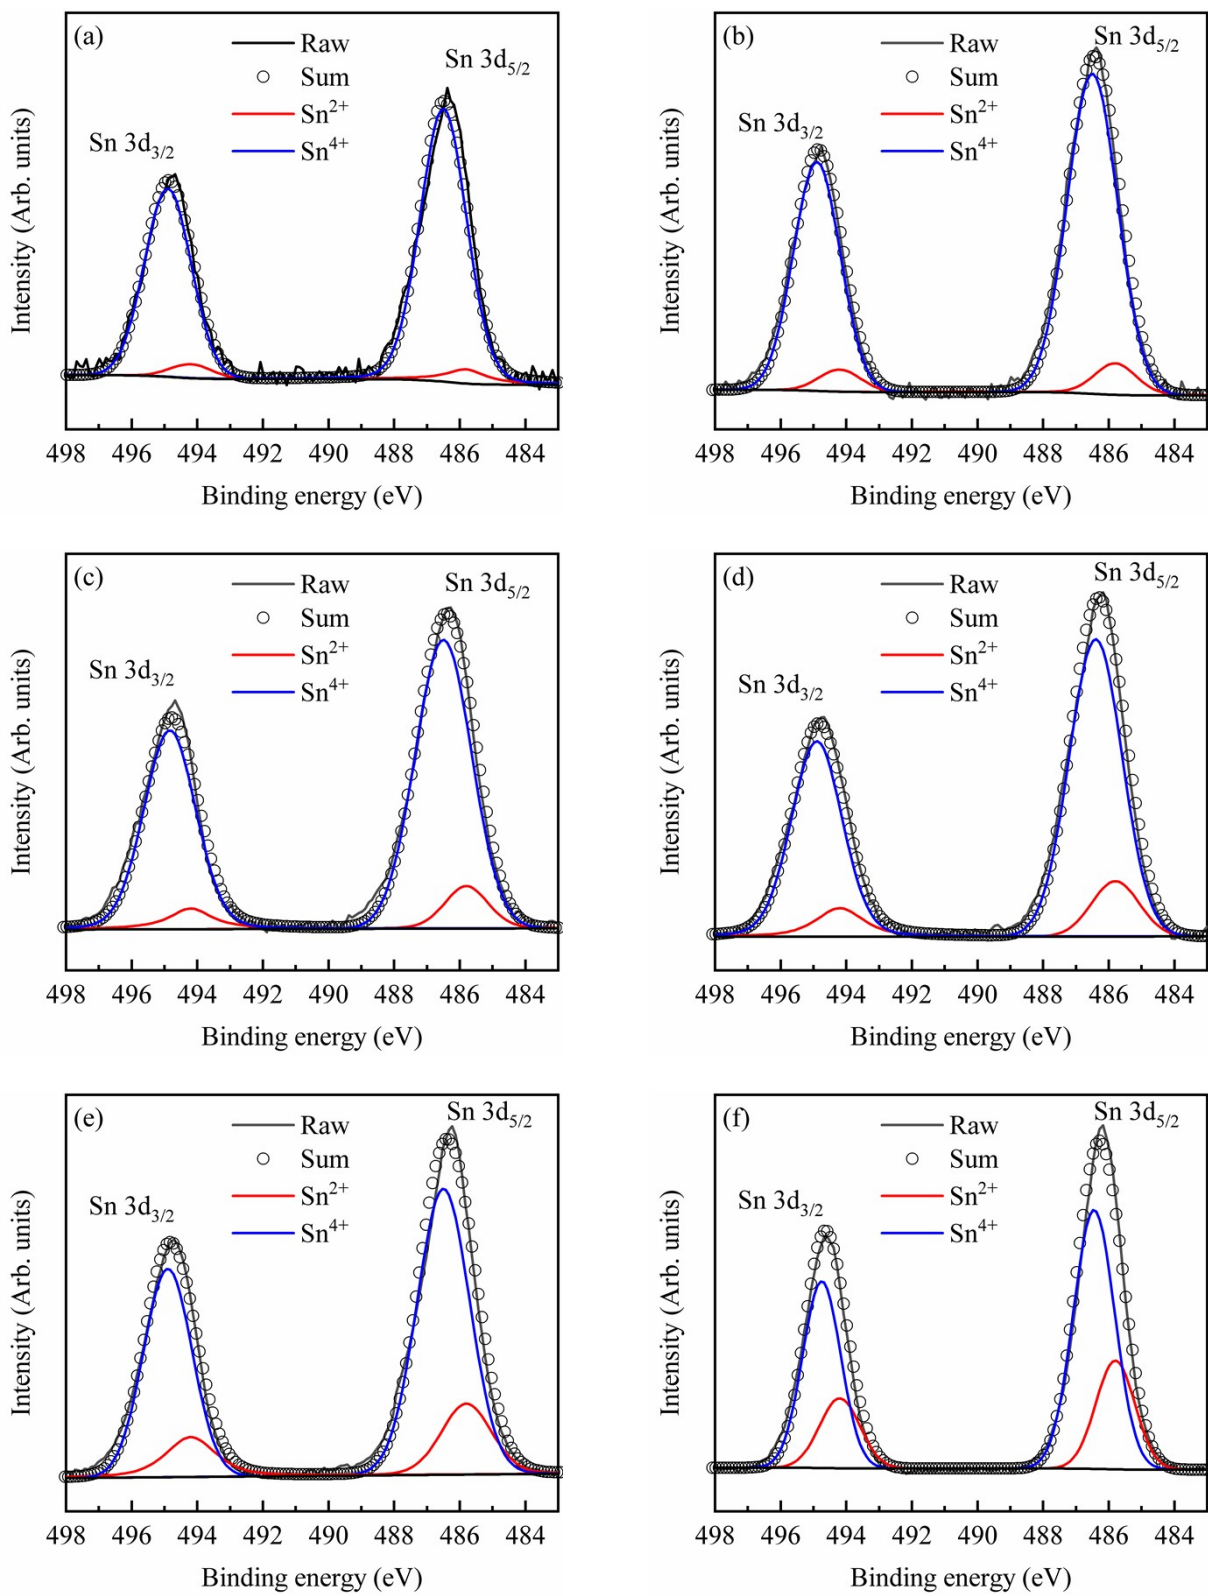

Figure S1. Deconvoluted Sn 3d XPS spectra for the ITO films with SnO<sub>2</sub> cycle ratios of (a) 2.5%, (b) 5%, (c) 7.5%, (d) 10%, (e) 15%, and (f) 20%.

Table S2. Peak areas of Sn<sup>4+</sup> and Sn<sup>2+</sup> components for the ITO films with different SnO<sub>2</sub> cycle ratios.

| SnO <sub>2</sub> cycle<br>(%) | Peak area                          |                                    |                                    |                                    | Sn <sup>4+</sup> /(Sn <sup>2+</sup> +Sn <sup>4+</sup> )<br>ratio (%) |
|-------------------------------|------------------------------------|------------------------------------|------------------------------------|------------------------------------|----------------------------------------------------------------------|
|                               | Sn <sup>4+</sup> 3d <sub>5/2</sub> | Sn <sup>4+</sup> 3d <sub>3/2</sub> | Sn <sup>2+</sup> 3d <sub>5/2</sub> | Sn <sup>2+</sup> 3d <sub>3/2</sub> |                                                                      |
| 2.5                           | 48449.96                           | 32299.97                           | 3208.44                            | 2138.96                            | 93.79                                                                |
| 5                             | 88311.62                           | 58874.41                           | 5975.34                            | 3983.56                            | 93.66                                                                |
| 7.5                           | 142127.72                          | 94751.81                           | 17235.50                           | 11490.33                           | 89.18                                                                |
| 10                            | 166091.55                          | 110727.70                          | 27641.51                           | 18427.67                           | 85.73                                                                |
| 15                            | 230015.85                          | 153343.90                          | 57174.21                           | 38116.14                           | 80.09                                                                |
| 20                            | 195791.55                          | 130527.70                          | 77769.39                           | 51846.26                           | 71.57                                                                |

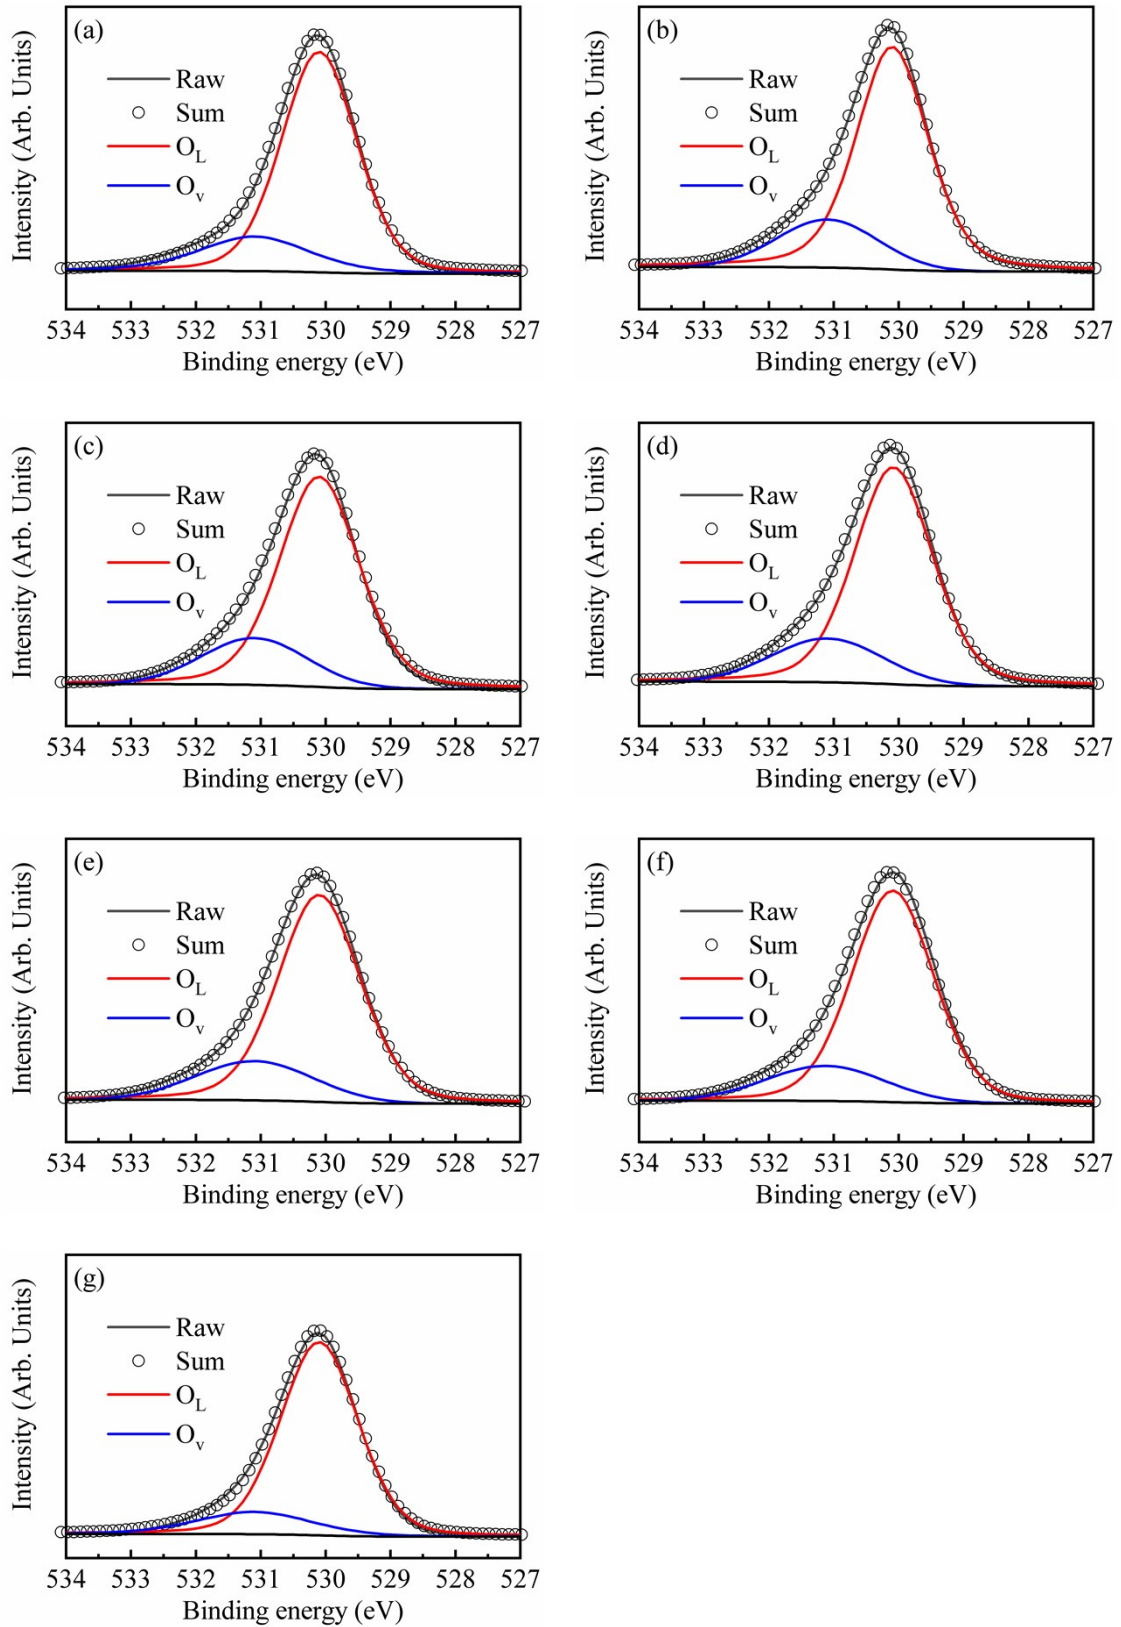

Figure S2. Deconvoluted O 1s spectra for the ITO films with SnO<sub>2</sub> cycle ratios of (a) 0%, (b) 2.5%, (c) 5%, (d) 7.5%, (e) 10%, (f) 15%, and (g) 20%.

Table S3. Peak areas of  $O_v$  and  $O_L$  components for the ITO films with different  $SnO_2$  cycle ratios.

| SnO <sub>2</sub> cycle ratio (%) | Peak area |          | $O_v/(O_L+O_v)$ (%) |
|----------------------------------|-----------|----------|---------------------|
|                                  | $O_v$     | $O_L$    |                     |
| 0                                | 92986.09  | 378760.2 | 19.71               |
| 2.5                              | 100702.01 | 388411.4 | 20.59               |
| 5                                | 103090.5  | 389505.2 | 20.93               |
| 7.5                              | 100164.8  | 397724.5 | 20.12               |
| 10                               | 95698.78  | 391809.7 | 19.63               |
| 15                               | 85066.9   | 392621.5 | 17.81               |
| 20                               | 58604.73  | 339531.1 | 14.72               |

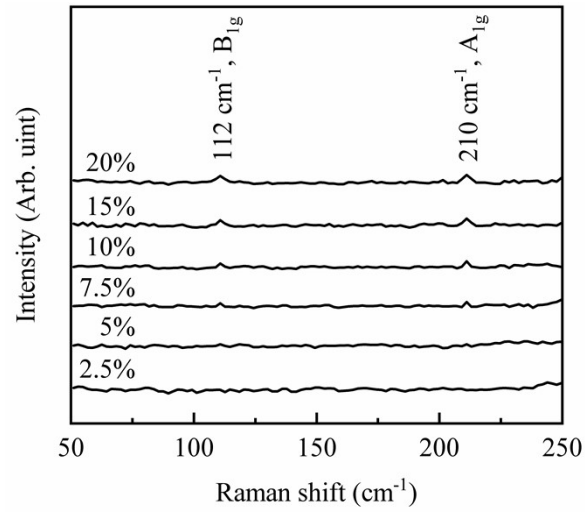

Figure S3. Raman spectra of the ITO samples with different SnO<sub>2</sub> cycle ratios.
